# Supplementary material for: Statistics of the Popularity of Chemical Compounds in Relation to the Non-Target Analysis
Source: MDPI journal article supplement (doi:10.3390/molecules26082394), 2021-04-20
Supplement: s1 [file s1]

Table 2S. The Fifty Most Popular Compounds\*

| Rating | Name                 | Structure                                                                           | Formula         | Number of data sources | Class of compounds                    |
|--------|----------------------|-------------------------------------------------------------------------------------|-----------------|------------------------|---------------------------------------|
| 1      | Niacin               | 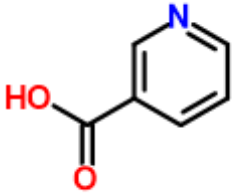   | $C_6H_5NO_2$    | 224                    | Antilipemic drug, vitamin             |
| 2      | Fluorouracil         |    | $C_4H_3FN_2O_2$ | 221                    | Antineoplastic agent                  |
| 3      | Glycine              |   | $C_2H_5NO_2$    | 212                    | Natural amino acid, antipruritic drug |
| 4      | Adenine              |  | $C_5H_5N_5$     | 212                    | Natural nucleobase, drug              |
| 5      | Indole-3-acetic acid |  | $C_{10}H_9NO_2$ | 211                    | Plant growth regulator                |

Table 2S. The Fifty Most Popular Compounds (continued)

| Rating | Name                        | Structure                                                                           | Formula           | Number of data sources | Class of compounds                             |
|--------|-----------------------------|-------------------------------------------------------------------------------------|-------------------|------------------------|------------------------------------------------|
| 6      | Paracetamol                 |    | $C_8H_9NO_2$      | 210                    | Analgesic, anti-inflammatory drug, antipyretic |
| 7      | Allopurinol                 |    | $C_5H_4N_4O$      | 207                    | Medicine used to treat gout and kidney stone   |
| 8      | Trans-resveratrol           |   | $C_{14}H_{12}O_3$ | 207                    | Antidote, antineoplastic agent, antioxidant    |
| 9      | $\gamma$ -Aminobutyric acid |  | $C_4H_9NO_2$      | 206                    | Antihypertensive agent                         |
| 10     | 4-Aminobenzoic acid         |  | $C_7H_7NO_2$      | 205                    | Ultraviolet filter                             |

Table 2S. The Fifty Most Popular Compounds (continued)

| Rating | Name            | Structure                                                                           | Formula        | Number of data sources | Class of compounds                                                         |
|--------|-----------------|-------------------------------------------------------------------------------------|----------------|------------------------|----------------------------------------------------------------------------|
| 11     | Cytosine        | 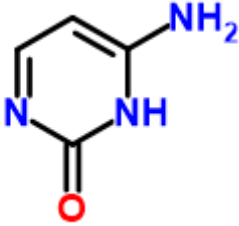   | $C_4H_5N_3O$   | 204                    | Natural nucleobase                                                         |
| 12     | Uracil          |    | $C_4H_4N_2O_2$ | 203                    | Natural nucleobase, antineoplastic agent.                                  |
| 13     | 4-Aminopyridine |   | $C_5H_6N_2$    | 203                    | Analgesic                                                                  |
| 14     | 1,7-Diazaindene |  | $C_7H_6N_2$    | 202                    | Calcitonin gene-related peptide receptor antagonists used in the treatment |
| 15     | Benzoic acid    |  | $C_7H_6O_2$    | 202                    | Antifungal agent, widespread chemical                                      |

Table 2S. The Fifty Most Popular Compounds (continued)

| Rating | Name                  | Structure                                                                           | Formula           | Number of data sources | Class of compounds                              |
|--------|-----------------------|-------------------------------------------------------------------------------------|-------------------|------------------------|-------------------------------------------------|
| 16     | Quinolinic acid       | 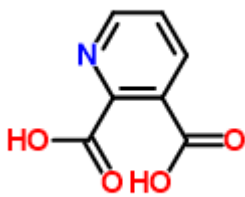   | $C_7H_5NO_4$      | 201                    | Involved in many disorders and living processes |
| 17     | Ibuprofen             |    | $C_{13}H_{18}O_2$ | 201                    | Anti-inflammatory drug                          |
| 18     | (E)-Ferulic acid      |   | $C_{10}H_{10}O_4$ | 201                    | Antihypertensive agent                          |
| 19     | Salicylic acid        |  | $C_7H_6O_3$       | 200                    | Widespread medical use                          |
| 20     | 4-Hydroxybenzaldehyde |  | $C_7H_6O_2$       | 200                    | Organic reagent                                 |

Table 2S. The Fifty Most Popular Compounds (continued)

| Rating | Name                    | Structure                                                                           | Formula           | Number of data sources | Class of compounds                                   |
|--------|-------------------------|-------------------------------------------------------------------------------------|-------------------|------------------------|------------------------------------------------------|
| 21     | Protocatechuic aldehyde | 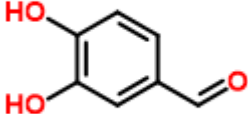   | $C_7H_6O_3$       | 200                    | Precursor in the biosynthesis, pharmacological agent |
| 22     | Fluorouracil            |    | $C_4H_3FN_2O_2$   | 198                    | Antineoplastic agent                                 |
| 23     | Tryptamine              |   | $C_{10}H_{12}N_2$ | 197                    | Significant biomedical role, organic reagent         |
| 24     | 8-Hydroxyquinoline      |  | $C_9H_7NO$        | 197                    | Antiseptic drug, disinfectant                        |
| 25     | Quercetin               |  | $C_{15}H_{10}O_7$ | 197                    | Flavonoid found in many foods and herbs              |

Table 2S. The Fifty Most Popular Compounds (continued)

| Rating | Name                  | Structure                                                                           | Formula              | Number of data sources | Class of compounds                                             |
|--------|-----------------------|-------------------------------------------------------------------------------------|----------------------|------------------------|----------------------------------------------------------------|
| 26     | Aciclovir             | 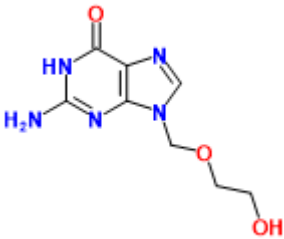   | $C_8H_{11}N_5O_3$    | 196                    | Antiviral agent                                                |
| 27     | 4-Hydroxybenzoic acid |    | $C_7H_6O_3$          | 196                    | Intermediate in synthesis and bio-synthesis                    |
| 28     | Melatonin             |   | $C_{13}H_{16}N_2O_2$ | 195                    | Antioxidant                                                    |
| 29     | Cinnamic acid         |  | $C_9H_8O_2$          | 195                    | Reagent in the synthesis of flavors, dyes, and pharmaceuticals |
| 30     | Aminocaproic acid     |  | $C_6H_{13}NO_2$      | 194                    | Hematological agent                                            |

Table 2S. The Fifty Most Popular Compounds (continued)

| Rating | Name             | Structure                                                                           | Formula           | Number of data sources | Class of compounds                                                       |
|--------|------------------|-------------------------------------------------------------------------------------|-------------------|------------------------|--------------------------------------------------------------------------|
| 31     | Dipicolinic acid | 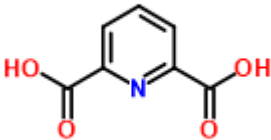   | $C_7H_5NO_4$      | 194                    | Found in bacterial spores                                                |
| 32     | Picolinic acid   |    | $C_6H_5NO_2$      | 194                    | Organic reagent                                                          |
| 33     | Apigenin         |   | $C_{15}H_{10}O_5$ | 194                    | Antineoplastic agent                                                     |
| 34     | Pyrazinamide     |  | $C_5H_5N_3O$      | 193                    | Antitubercular agent                                                     |
| 35     | Succinic acid    |  | $C_4H_6O_4$       | 193                    | Used in food and beverage industry, excipient in pharmaceutical products |

Table 2S. The Fifty Most Popular Compounds (continued)

| Rating | Name                               | Structure                                                                           | Formula       | Number of data sources | Class of compounds                                                   |
|--------|------------------------------------|-------------------------------------------------------------------------------------|---------------|------------------------|----------------------------------------------------------------------|
| 36     | $\beta$ -Alanine                   | 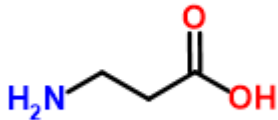   | $C_3H_7NO_2$  | 193                    | Dietary supplement and other use                                     |
| 37     | Gallic acid                        |    | $C_7H_6O_5$   | 193                    | Antioxidant; used in tanning, ink dyes, and the manufacture of paper |
| 38     | 1-Aminocyclopropanecarboxylic acid |   | $C_4H_7NO_2$  | 193                    | Plant growth regulator                                               |
| 39     | Flucytosine                        |  | $C_4H_4FN_3O$ | 193                    | Antifungal agent                                                     |
| 40     | Vanillic acid                      |  | $C_8H_8O_4$   | 193                    | Flavoring agent, an intermediate in the production of vanillin       |



Table 2S. The Fifty Most Popular Compounds (continued)

| Rating | Name                        | Structure                                                                           | Formula            | Number of data sources | Class of compounds                                        |
|--------|-----------------------------|-------------------------------------------------------------------------------------|--------------------|------------------------|-----------------------------------------------------------|
| 41     | Indole-3-butyric acid       | 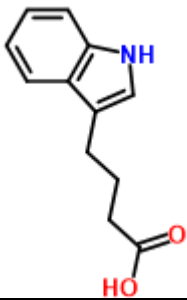   | $C_{12}H_{13}NO_2$ | 192                    | Plant growth regulator                                    |
| 42     | 3-Formyl indole             |    | $C_9H_7NO$         | 192                    | Biologically active metabolite                            |
| 43     | Genistein                   |   | $C_{15}H_{10}O_5$  | 191                    | Antineoplastic agent                                      |
| 44     | Protocatechuic acid         |  | $C_7H_6O_4$        | 191                    | Metabolite of antioxidant polyphenols, found in green tea |
| 45     | 4-Hydroxyphenyl-acetic acid |  | $C_8H_8O_3$        | 191                    | Intermediate in organic synthesis                         |

Table 2S. The Fifty Most Popular Compounds (continued)

| Rating | Name                   | Structure                                                                           | Formula         | Number of data sources | Class of compounds                            |
|--------|------------------------|-------------------------------------------------------------------------------------|-----------------|------------------------|-----------------------------------------------|
| 46     | Pipecolic acid         |    | $C_6H_{11}NO_2$ | 191                    | Diagnostic marker of epilepsy                 |
| 47     | Mesalazine             |    | $C_7H_7NO_3$    | 191                    | Anti-inflammatory drug                        |
| 48     | Amifampridine          |   | $C_5H_7N_3$     | 191                    | Drug in the treatment of rare muscle diseases |
| 49     | Thymine                |  | $C_5H_6N_2O_2$  | 190                    | Nucleobase                                    |
| 50     | 5-Bromo-2-pyridinamine |  | $C_5H_5BrN_2$   | 190                    | Organic reagent                               |

\* The advanced search of data sources in ChemSpider [14] in April 8, 2021 by selecting all sources. List of 100,1000, or 10000 the most popular compounds are automatically searched. Features of compounds were extracted from this database and the literature cited there.
