# Supplementary material for: Statistics of the Popularity of Chemical Compounds in Relation to the Non-Target Analysis
Source: Molecules. 2021 Apr 20;26(8):2394. doi: 10.3390/molecules26082394 (PMC8074313; doi:10.3390/molecules26082394)
Supplement: Supplementary file 1 [file molecules-26-02394-s001.zip › Table 1S. ID Numbers.xls]

## Sheet: Лист1
ChemSpider	PubChem
185480	1416
249341	1941
254596	3432
351471	6016
410679	9109
461672	12414
553159	14027
567831	17172
628034	24090
712924	24844
1012512	26044
1085972	34427
1104526	37252
1114007	37403
1237807	48989
1278939	50240
1309790	52631
1320913	56234
1327382	62518
1334114	64099
1404985	65490
1469484	66509
1495114	66601
1578714	69644
1719062	70989
1731798	73162
1774907	73848
1813492	74113
1816077	74527
1896882	75869
1927753	79711
1953506	87501
2086652	90785
2199322	94856
2212681	99141
2293799	100885
2303759	102962
2557382	103637
2577547	107502
2744546	109330
2768023	109372
2806906	114119
2841722	118154
2910686	126393
2950608	126882
3010275	134308
3073988	146493
3179149	146620
3219216	157239
3224565	158364
3252054	161324
3261459	162150
3371011	162886
3395804	163320
3596199	172744
3622394	175161
3692871	181704
3742609	186093
3777651	186784
3778042	189406
3844157	189650
3953024	192288
4168061	193679
4234924	197676
4272524	200363
4274731	201473
4316591	205552
4337607	209791
4427784	211570
4584117	215493
4660623	216157
4675663	216438
4684990	220152
4904602	221095
4926182	223674
5090855	223952
5143576	232846
5196720	233251
5250730	235062
5527942	242918
5654157	243354
5755542	243964
5880308	245566
5925996	248330
6000845	249152
6036506	250244
6151237	251200
6217815	251591
6324343	251639
6417493	256293
6426191	257587
6459107	262152
6586007	267750
6676114	268876
6750470	271482
6782081	279488
6798946	281574
6829535	287756
6844802	287935
6912088	289409
6959180	289849
7059824	290796
7218903	293373
7259012	295226
7371109	299986
7522011	301529
7785141	303886
7923384	310188
8124896	319860
8144005	323121
8152885	326181
8172469	326196
8313265	326817
8325735	329221
8381207	331187
8432815	332504
8437881	337817
8479124	337989
8620997	339431
8681111	342186
8715232	343264
8863376	344258
8922244	347539
9049702	351380
9077766	355950
9256135	356855
9402104	357506
9484774	359762
9557346	364522
9811442	373106
9890094	375914
10059886	381683
10333354	381693
10419890	388586
10673387	389598
10707258	396931
10720077	398692
10842203	402030
10917977	405437
11056690	407303
11089715	409461
11108671	413919
11688017	416245
11713626	416938
11741322	419104
11759745	426071
11840295	426475
11984881	428552
12071444	430147
12091364	436067
12108322	438890
12111811	440313
12433213	441264
12580561	442164
12664487	443940
12676577	452347
12784412	452904
12793047	464031
12808025	469375
12834052	470067
13201794	474823
13221497	474958
13372252	478803
13402462	481174
13683269	481212
13742847	483730
13866899	486527
14008833	486993
14016722	488719
14142978	489025
14143225	491736
14165784	498066
14198939	500657
14221187	506951
14284843	512469
14348196	523190
14455538	525021
14515455	525224
14650497	526145
14682501	530525
15076286	532637
15095099	536988
15258277	553630
15281801	554049
15545433	555681
15614826	556593
15619316	557486
15702630	558137
15763430	558997
15855575	571721
15977574	578212
16155137	579672
16281967	581452
16398146	587104
16498247	592053
16501912	592733
16650388	595560
16799408	596131
16831311	596878
16833713	601389
16977177	601852
17092269	606196
17277622	616027
17449147	621084
17521417	621978
17583869	630257
17864838	633012
17880992	639625
17918078	640559
17938683	643749
17942792	646556
18006619	649090
18115790	649369
18184192	651575
18277238	668629
18340523	669513
18369043	678079
18450715	679464
18664274	682745
18711908	683648
18850491	684263
18942800	687476
18995842	689641
19062851	690996
19188280	694054
19321650	694869
19440802	696453
19442682	697649
19490466	701595
19548605	703100
19914470	703802
20065414	705483
20278280	708394
20279340	720800
20327737	722436
20342391	722697
20349582	725789
20357542	727176
20378908	727909
20506549	728374
20687248	728426
20714006	732689
20723645	734439
20775896	735631
20803836	736548
20854932	740591
21020805	744449
21027532	747258
21073310	747441
21371520	747568
21449803	752259
21625137	753187
21630552	757875
21769974	758236
21842319	758539
21850839	760626
21900299	763069
21919265	764881
21995664	765049
22096047	765740
22183175	766487
22203247	767980
22234403	768345
22240570	776353
22246141	778014
22457853	783911
22960182	789582
22962858	790102
23189211	792028
23199031	795372
23217527	795559
23217924	797324
23243369	799196
23261793	803475
23908443	806880
24427291	813306
24581636	813890
24606624	814838
24779899	815272
24859160	817528
24882675	819562
24931888	820082
25041431	825347
25070833	831186
25106317	835647
25113408	836103
25135658	837539
25217343	843624
25471718	844955
25477412	846660
25477548	848816
25483411	854075
25531024	854495
25600332	855255
25641926	856559
25702737	857934
25765286	859968
25789271	862368
25877062	880462
26027938	880517
26349930	881289
26375236	883290
26546576	885824
26680414	890502
26692368	899498
26840168	902554
26870971	902916
26966206	927572
27142503	928714
27163525	930230
27182424	935405
27313585	937298
27422954	937677
27473377	940407
27483077	942960
27560992	950131
27612146	954806
27632911	960902
27673228	961934
27751966	964634
27930540	968343
28016777	968628
28180230	971938
28235322	975356
28253181	976705
28257598	979795
28262120	984573
28317307	987195
28357649	989452
28367266	998383
28436170	998615
28455013	999195
28473245	1000891
28478590	1001237
28535482	1001458
28569588	1003004
28631413	1004534
28686907	1007774
28701691	1011336
28706673	1011427
28767106	1015440
28817090	1015909
28881148	1025249
28903779	1027936
28946501	1033386
28951265	1038938
29030302	1041201
29162801	1041707
29274019	1041789
29302071	1042335
29407470	1042386
29481889	1042515
29665019	1042770
29757131	1042812
29801496	1043150
29896016	1045674
29977631	1046161
30044297	1046513
30228781	1048878
30301376	1052728
30345408	1057027
30415676	1059090
30531134	1061782
30584397	1065880
30647624	1066943
30654927	1067049
30677069	1067581
30797412	1074944
31036001	1075975
31088776	1076504
31300959	1082489
31656842	1086118
31710780	1088960
31910731	1095378
32126853	1097327
32296075	1100664
32503199	1103004
32505356	1107302
32518424	1107651
32540080	1107913
32603735	1116797
32640454	1116831
32668974	1119461
32862127	1120431
32999863	1120909
33068688	1122768
33101645	1125536
33102906	1125658
33339657	1127277
33480872	1131568
33532226	1131600
33540823	1133048
33604753	1135033
33716176	1137945
33765421	1141631
33808120	1145427
33873250	1148793
34126767	1148818
34144709	1150371
34153601	1154993
34316206	1155163
34433337	1155412
34855248	1161469
34867828	1161674
34873973	1165513
34909661	1169118
35071662	1171540
35093937	1175525
35211098	1176818
35375006	1177390
35513047	1183283
35522126	1184833
35534798	1194826
35538880	1200400
35938893	1203543
36220602	1203767
36227468	1211178
36569903	1212510
36601639	1215234
36656619	1215813
36695348	1217029
36744700	1224288
36771346	1233330
36811122	1234716
36906833	1236424
36992163	1241796
37004734	1243278
37007298	1252778
37023810	1260680
37258721	1262272
37446996	1263185
37461623	1271838
37743607	1274873
37872530	1281199
37960503	1287881
38097913	1288080
38134807	1288427
38209607	1288824
38235246	1289174
38322245	1293092
38376821	1299674
38384763	1303013
38489953	1303263
38509267	1303494
38522452	1305695
38557675	1314542
38565086	1315572
38613673	1319027
38786009	1320067
38881703	1322063
39002826	1322440
39220598	1327818
39282497	1328838
39293112	1329462
39370805	1330469
39373068	1335467
39517105	1335989
39600372	1338475
39639439	1340993
39680042	1342504
39762685	1344107
39797458	1344692
39806106	1348571
39895553	1348873
40108995	1350909
40151917	1354584
40327158	1355441
40356685	1359184
40424540	1359667
40463488	1365443
40493416	1367773
40529799	1373407
40686023	1375086
40722875	1375626
40837960	1377737
40853593	1383057
40893693	1384036
40979374	1384983
41285264	1386046
41303338	1386436
41435726	1386726
41530962	1389151
41660653	1390618
41769631	1392984
41955045	1395597
41999593	1398961
42094120	1413726
42130591	1416466
42281683	1416895
42340451	1418052
42405522	1421881
42433152	1421990
42454303	1425072
42509709	1431994
42513268	1434805
42632385	1441120
42670863	1441240
42732340	1443227
42785720	1446872
42842282	1451786
42843485	1458057
42849839	1458233
42952430	1462419
42955875	1462835
43070342	1464348
43164608	1465735
43303327	1471338
43412018	1482385
43548729	1485942
43597548	1486861
43694474	1487654
43725197	1488859
43747208	1490535
43848251	1490587
43949682	1494914
43979607	1496444
44063065	1504590
44105500	1505462
44259667	1505495
44563083	1514613
44573506	1519422
44638082	1522724
44678704	1526775
44706604	1526926
44730886	1528349
44855401	1539432
44888352	1540375
44957260	1543390
45031275	1548218
45085182	1555887
45217316	1560373
45232536	1571024
45249132	1572307
45253894	1573906
45283173	1576531
45350089	1580004
45354842	1580340
45470257	1582889
45521442	1582985
45598078	1592174
45606517	1593451
45734318	1596609
45843560	1597364
46014711	1597382
46023318	1598314
46051331	1598946
46112301	1599856
46336265	1600430
46401227	1601732
46427674	1601948
46505205	1607166
46706359	1607557
46970777	1613287
47019427	1614691
47032424	1619287
47052616	1623492
47080565	1629768
47225179	1631177
47355813	1632523
47428441	1637171
47434389	1638946
47575106	1639605
47666078	1639614
47730747	1654896
47962684	1656263
48186021	1663579
48303901	1666194
48467857	1668717
48491478	1669910
48496651	1671494
48497643	1671511
48498390	1676185
48720005	1677073
48731541	1678978
48772281	1685958
48860170	1687161
48949174	1692402
48976048	1692674
48996638	1697878
49006275	1699728
49007010	1704422
49378630	1705553
49397299	1706956
49626042	1709155
49655944	1710037
49823330	1713575
49834401	1714451
49905264	1714614
49912097	1715938
49956897	1719164
50064304	1721355
50250249	1721836
50369131	1723849
50376155	1724703
50432982	1727185
50485708	1732685
50805992	1740824
50837709	1741809
50844580	1744448
50928649	1745396
50991076	1747577
51100054	1750753
51124899	1751687
51204989	1756718
51370318	1756947
51483246	1758700
51532077	1763040
51654429	1765498
51696374	1766752
51770928	1768121
52002108	1774076
52045156	1777676
52090119	1778430
52099776	1781091
52121081	1783415
52145594	1785824
52156908	1788758
52218235	1789533
52336208	1802961
52402138	1805108
52472571	1808864
52501360	1814161
52591246	1814959
52619015	1815008
52709094	1818559
52725205	1818662
52860314	1821141
52896141	1821679
52984669	1823889
53000951	1826063
53067299	1828386
53131791	1829858
53159285	1832173
53394293	1834043
53447778	1843460
53486088	1848140
53571907	1855780
53586531	1857915
53615941	1860562
53625040	1862121
53691745	1863903
53762443	1864183
53793198	1864222
53821256	1866989
53850639	1872384
53874851	1876633
53959665	1878105
54100232	1879152
54157996	1879607
54177188	1884191
54219965	1884679
54257658	1885463
54431699	1885742
54447548	1886830
54477914	1890547
54537006	1893477
54572741	1894411
54618044	1898108
54672724	1906853
54970849	1907128
55054850	1909420
55222136	1915512
55317361	1919709
55474952	1920894
55551555	1933373
55578645	1938109
55810071	1942783
55839277	1943941
56000838	1947744
56085740	1948876
56128583	1952893
56133991	1953442
56190842	1954246
56210106	1967164
56436250	1971345
56452026	1981285
56603217	1981717
56668304	1985874
56706236	1986726
56729312	1987511
56753595	1992600
56766274	1995822
57098381	1996440
57270219	1998512
57311848	1999599
57357406	2004495
57464910	2009006
57507517	2011179
57705653	2011320
57749575	2019391
57820540	2020133
58311198	2024983
58437161	2028524
58693079	2030054
58845277	2030473
58887963	2032896
58956657	2033745
59046899	2034269
59119882	2034316
59153233	2036067
59208072	2037232
59331472	2037720
59331986	2038961
59342109	2042354
59435943	2050818
59457713	2053012
59749443	2053679
59763092	2053911
59805288	2055375
59829964	2056131
59942692	2058261
60279694	2059570
60333809	2062434
60409358	2065622
60460943	2066866
60548113	2068716
60702110	2069762
60715613	2072563
60878465	2075956
60910148	2077783
60959348	2079482
61112621	2083040
61145366	2089620
61212007	2102926
61286303	2109453
61481456	2109771
61562097	2111221
61622945	2117310
61726158	2123347
61742210	2136614
61753857	2139907
61796683	2142753
61816525	2143187
61837668	2144478
61998680	2153950
62131265	2156149
62193473	2159708
62209879	2162430
62295211	2172798
62390307	2177784
62420648	2179395
62454914	2183760
62583993	2184053
62815854	2185698
62894914	2189258
62904606	2192359
62910632	2193293
63252648	2195967
63272209	2196936
63423743	2197611
63537854	2197853
63758261	2198395
63764504	2199880
63771225	2208109
63921992	2209724
63962807	2210319
63987308	2210488
64064328	2213555
64158632	2220039
64163064	2221567
64304809	2223824
64393951	2224475
64467625	2226643
64505171	2227222
64508604	2229351
64543677	2229744
64583687	2229869
64604736	2233526
64681814	2235699
64734945	2240848
64737067	2244688
64745973	2248082
64935691	2248569
64976027	2253952
65000623	2256943
65103567	2266487
65178817	2270942
65189872	2273534
65337053	2275905
65348067	2278137
65419508	2278376
65429559	2279511
65564907	2280351
65663118	2281365
65675779	2289122
65862139	2291337
65867014	2292224
65993449	2295531
66023883	2295634
66220125	2297174
66221448	2297871
66318363	2297944
66528543	2301160
66618961	2302710
66731901	2311456
66924036	2313589
67084959	2317979
67201363	2318116
67335933	2321273
67603023	2322008
67631621	2325997
67707650	2327275
67992179	2327942
67999663	2328630
68014139	2328811
68144139	2328892
68154803	2332731
68198129	2334717
68387327	2341022
68408726	2341697
68451026	2342227
68640300	2344716
68728603	2344992
68793882	2345111
68885781	2348916
68968796	2350326
69106671	2353330
69111120	2369605
69140332	2371478
69195588	2371868
69403704	2377404
69495850	2378009
69645085	2387263
69699987	2388942
69711943	2399908
69736432	2400408
70062515	2400658
70083991	2402984
70107320	2408272
70141297	2411309
70198857	2415259
70251703	2415483
70301401	2421283
70447531	2424954
70484636	2426021
70557192	2431807
70646521	2433329
70682581	2439332
70806149	2439353
70898037	2442492
70913123	2445508
70937898	2445695
70955372	2450415
70987433	2450857
70991456	2451951
71001134	2452852
71053514	2454950
71221257	2456359
71252442	2457493
71274725	2461859
71288440	2462593
71291160	2468808
71432829	2472580
71513841	2479575
71563592	2479879
71679009	2481722
71711784	2484550
71837009	2490868
71978749	2491765
71988831	2492125
72007521	2503567
72073267	2504284
72326660	2505411
72359074	2510635
72409816	2511608
72417394	2514332
72427414	2516352
72432251	2523533
72526796	2523746
72648548	2525078
72662198	2526247
72939539	2527481
72966781	2528274
73162102	2532884
73163928	2542863
73204731	2552156
73266590	2555267
73268169	2555351
73455858	2555472
73528214	2559501
73813969	2564167
73880504	2565745
73901855	2565930
74159842	2577293
74288788	2578267
74390773	2582890
74426069	2596843
74475354	2597920
74523089	2602214
74578030	2603120
74632313	2603664
74676791	2616927
74701485	2622558
74771993	2622923
74800574	2632954
74903450	2633196
74943491	2635816
75053454	2640251
75128453	2643816
75130752	2649018
75234760	2652310
75250181	2654648
75266977	2658842
75296244	2665291
75313374	2667584
75365396	2668008
75519645	2669061
75573260	2669842
75746404	2671402
75758660	2672823
75828144	2674315
75913699	2678343
76006747	2689702
76018639	2689768
76100671	2698574
76145150	2700573
76164775	2701280
76176375	2707660
76240157	2707916
76314529	2709075
76354150	2713106
76355421	2719499
76404846	2727907
76423537	2729575
76433488	2730229
76459596	2740085
76525982	2742513
76699200	2742722
76744660	2755667
76763850	2759568
76980301	2760587
77005962	2760913
77092444	2762292
77099296	2763392
77121561	2764366
77212899	2766408
77358894	2769722
77485033	2774114
77578593	2777998
77786396	2781334
78028057	2782903
78028057	2784441
78075053	2791664
78401977	2792054
78620904	2797634
78729247	2798280
78846086	2800338
78885869	2804939
78908632	2808335
78943349	2809992
78959253	2811814
79010274	2815282
79212937	2815901
79390606	2819051
79449858	2819996
79508381	2823617
79560302	2828114
79564229	2828844
79566225	2833311
79699493	2839092
79779198	2840879
79822553	2842324
80006597	2842678
80034122	2845142
80120772	2845714
80213110	2855841
80318127	2861190
80405357	2863587
80416162	2863826
80442352	2866484
80610223	2869956
80676649	2871052
80712917	2872988
80720534	2874749
80769078	2877564
80817494	2880471
80837271	2881515
80844374	2882207
80865171	2882841
80915256	2885854
80930147	2895967
80931358	2899001
81024466	2900343
81152309	2905378
81204236	2906121
81585576	2906538
81743989	2909339
81908929	2915463
82030347	2915891
82038211	2919441
82038345	2922456
82254049	2923944
82280167	2925563
82379632	2926487
82473687	2927829
82532467	2929303
82546906	2929337
82780097	2929941
82834306	2931119
82844040	2933499
	2934382
	2935485
	2941514
	2942690
	2944369
	2947680
	2954323
	2958202
	2958568
	2958596
	2958866
	2962420
	2964636
	2964930
	2970783
	2970916
	2974459
	2978133
	2981374
	2982055
	2993731
	2995309
	2997328
	3000685
	3000885
	3001699
	3006912
	3011362
	3011764
	3012069
	3020769
	3021252
	3022028
	3025385
	3026577
	3029786
	3031848
	3035403
	3035562
	3036058
	3041744
	3042340
	3049799
	3051011
	3053862
	3057869
	3063262
	3067443
	3067602
	3070928
	3074554
	3080236
	3088454
	3098830
	3100955
	3104799
	3108738
	3112345
	3115478
	3115482
	3115740
	3121345
	3123055
	3125978
	3135391
	3139243
	3139853
	3142181
	3144217
	3144762
	3147870
	3152898
	3158391
	3162217
	3163396
	3171657
	3173475
	3175752
	3176004
	3176361
	3181510
	3188885
	3189425
	3195273
	3200261
	3200484
	3200591
	3200979
	3202759
	3202910
	3205301
	3212561
	3219090
	3222492
	3223615
	3224611
	3225280
	3225318
	3227074
	3228714
	3231049
	3231762
	3232614
	3232665
	3237139
	3237625
	3238452
	3239983
	3242448
	3244916
	3245634
	3246947
	3258221
	3260091
	3260505
	3266328
	3270134
	3272831
	3274473
	3274625
	3281221
	3282408
	3282409
	3283557
	3284929
	3290651
	3292446
	3292527
	3293358
	3293721
	3294581
	3294804
	3297086
	3297978
	3299388
	3304215
	3304796
	3305961
	3307873
	3308217
	3311647
	3312577
	3314807
	3319908
	3323524
	3325260
	3326138
	3326873
	3330109
	3332767
	3336837
	3338662
	3339545
	3340936
	3341224
	3342583
	3348082
	3348706
	3348778
	3350226
	3353682
	3354149
	3355868
	3357702
	3360355
	3365463
	3366839
	3376294
	3376308
	3376931
	3379202
	3386977
	3393682
	3397867
	3404643
	3407282
	3407756
	3409652
	3410701
	3412201
	3425113
	3426854
	3427296
	3428203
	3431414
	3435231
	3435464
	3437588
	3437802
	3440388
	3443328
	3443343
	3443461
	3444039
	3447594
	3448001
	3449984
	3451281
	3457206
	3458900
	3462169
	3463009
	3464574
	3464581
	3470587
	3475408
	3477527
	3481831
	3483860
	3486768
	3489376
	3492174
	3500421
	3503010
	3506603
	3519722
	3519868
	3521156
	3524706
	3535317
	3539180
	3541385
	3542277
	3544089
	3544146
	3544288
	3555214
	3559325
	3568773
	3569325
	3570388
	3578368
	3582654
	3582847
	3585368
	3587821
	3588709
	3593493
	3601684
	3607157
	3611381
	3612962
	3628479
	3632875
	3635865
	3636537
	3637355
	3637429
	3641474
	3646885
	3651695
	3652717
	3653412
	3661513
	3664614
	3665095
	3670085
	3674724
	3676945
	3678444
	3688473
	3691955
	3693066
	3694757
	3694901
	3704791
	3716636
	3721214
	3726485
	3727592
	3735979
	3737234
	3737975
	3741440
	3742066
	3744942
	3749779
	3762204
	3766718
	3771013
	3773823
	3776154
	3776176
	3780635
	3781531
	3782108
	3784106
	3785038
	3785207
	3785303
	3790794
	3791416
	3796539
	3801405
	3805846
	3812022
	3815444
	3815991
	3818218
	3819064
	3823072
	3823763
	3831639
	3834286
	3839015
	3846460
	3846880
	3848836
	3858405
	3861130
	3866002
	3866224
	3868027
	3869395
	3869559
	3870354
	3870504
	3877057
	3878062
	3879763
	3881046
	3883013
	3884282
	3889285
	3896879
	3900996
	3909285
	3914953
	3919173
	3924226
	3926496
	3930137
	3933243
	3936636
	3939773
	3941246
	3944886
	3949539
	3950199
	3951564
	3952063
	3956528
	3960842
	3962147
	3962258
	3965817
	3978750
	3980820
	3987065
	3988633
	3995588
	3996503
	3999890
	4003976
	4014792
	4014989
	4015524
	4020182
	4024354
	4032956
	4034160
	4035165
	4036738
	4038033
	4044598
	4045813
	4045872
	4051007
	4054059
	4058892
	4061134
	4063162
	4064457
	4065294
	4065816
	4067345
	4075623
	4088185
	4088737
	4089428
	4092107
	4093576
	4094583
	4095832
	4101039
	4101334
	4102558
	4105715
	4107868
	4108126
	4109434
	4112123
	4113052
	4115450
	4118951
	4121634
	4121966
	4124874
	4125132
	4129148
	4129474
	4131432
	4132979
	4133039
	4137770
	4140250
	4140336
	4143143
	4146844
	4149360
	4153133
	4153296
	4155730
	4158275
	4162893
	4169362
	4170022
	4170760
	4174623
	4174930
	4176666
	4182760
	4183974
	4190639
	4190654
	4191087
	4192305
	4193283
	4196742
	4198419
	4206175
	4206568
	4214755
	4216138
	4222549
	4226270
	4227645
	4229578
	4243314
	4248550
	4250584
	4251999
	4254274
	4256904
	4263443
	4263896
	4268037
	4270371
	4270412
	4270434
	4275866
	4276714
	4278086
	4278306
	4278863
	4286102
	4289507
	4289611
	4290481
	4296394
	4305155
	4310488
	4315001
	4315761
	4316126
	4322716
	4324952
	4327102
	4329115
	4332259
	4334995
	4335684
	4335755
	4336762
	4337447
	4341252
	4344567
	4346554
	4353285
	4358743
	4361983
	4362138
	4368505
	4370112
	4374647
	4375417
	4382553
	4385116
	4385180
	4391417
	4392115
	4394042
	4394664
	4396791
	4399294
	4404459
	4410620
	4410860
	4411709
	4414327
	4425114
	4425806
	4430191
	4432611
	4433159
	4435725
	4436299
	4446015
	4449175
	4450083
	4453873
	4455690
	4457015
	4458333
	4459765
	4460572
	4463207
	4464402
	4466203
	4467473
	4470724
	4471530
	4471636
	4473271
	4474134
	4474200
	4475959
	4481738
	4484156
	4484564
	4487343
	4487720
	4488176
	4489632
	4492025
	4494392
	4497875
	4499126
	4502160
	4506145
	4512749
	4514391
	4514406
	4515052
	4515392
	4516172
	4518974
	4520784
	4523009
	4525989
	4529568
	4531362
	4531646
	4532905
	4533925
	4534374
	4540967
	4542864
	4547921
	4552394
	4552757
	4553194
	4555507
	4558615
	4565110
	4571277
	4573302
	4579403
	4581944
	4584226
	4587454
	4593284
	4596056
	4596461
	4596520
	4597899
	4598488
	4598797
	4598954
	4601961
	4606387
	4606576
	4610208
	4612045
	4612446
	4616314
	4617734
	4619842
	4625061
	4625200
	4625685
	4625931
	4627268
	4628427
	4630888
	4631960
	4636519
	4640190
	4641657
	4642070
	4643494
	4644058
	4644989
	4646229
	4648578
	4650549
	4653739
	4654726
	4654961
	4662839
	4663259
	4667374
	4670743
	4671952
	4672347
	4675231
	4675618
	4677215
	4688559
	4690840
	4697980
	4706371
	4706723
	4710022
	4711769
	4711949
	4713333
	4716392
	4721942
	4724009
	4725656
	4730188
	4733018
	4733064
	4733141
	4733262
	4743008
	4746362
	4747542
	4755131
	4759323
	4759501
	4763900
	4767651
	4772190
	4773096
	4774695
	4774795
	4777544
	4780631
	4783140
	4787739
	4788408
	4788942
	4789669
	4792786
	4797125
	4799142
	4799237
	4800954
	4808219
	4811195
	4816895
	4825435
	4827972
	4828782
	4829927
	4834789
	4835227
	4835433
	4845633
	4851125
	4852036
	4852375
	4853527
	4854702
	4855510
	4863281
	4866377
	4868073
	4872439
	4874308
	4874519
	4874638
	4881047
	4887809
	4889811
	4890063
	4895011
	4906619
	4916002
	4918912
	4919965
	4931485
	4934614
	4935171
	4935297
	4936355
	4942005
	4942208
	4945320
	4945333
	4945793
	4945955
	4947439
	4950085
	4951167
	4952651
	4954963
	4958413
	4958571
	4966975
	4967206
	4968832
	4981301
	4985320
	4987517
	4999488
	4999877
	5000884
	5001140
	5002016
	5008464
	5011286
	5014943
	5019385
	5021215
	5024872
	5025655
	5037118
	5039539
	5042422
	5042790
	5044989
	5046844
	5060263
	5060770
	5062972
	5067659
	5074304
	5075071
	5075794
	5077027
	5077378
	5082501
	5082652
	5085103
	5086850
	5090141
	5101012
	5101446
	5106529
	5108323
	5109881
	5112689
	5115258
	5118530
	5119788
	5121556
	5126994
	5128735
	5129048
	5136856
	5137475
	5142837
	5154563
	5159924
	5161097
	5162343
	5166713
	5167880
	5169599
	5181637
	5182173
	5184649
	5185684
	5189992
	5193383
	5195393
	5196870
	5204592
	5210383
	5210402
	5210697
	5212520
	5216323
	5223087
	5224542
	5225779
	5227613
	5229713
	5230962
	5233152
	5234720
	5235984
	5245733
	5246339
	5246904
	5249181
	5249964
	5256352
	5258504
	5260593
	5261219
	5262829
	5265381
	5267458
	5267606
	5268240
	5271922
	5281437
	5285730
	5289547
	5290063
	5290792
	5291639
	5293773
	5294894
	5295507
	5296664
	5301455
	5302021
	5303177
	5307377
	5307746
	5313078
	5313499
	5316939
	5316978
	5317951
	5337809
	5337890
	5338654
	5339346
	5339460
	5346891
	5348107
	5349023
	5349028
	5351985
	5352948
	5353572
	5353689
	5355465
	5357619
	5360828
	5361290
	5361778
	5366168
	5366608
	5372061
	5372089
	5373358
	5375001
	5379154
	5384198
	5384747
	5389182
	5392095
	5400521
	5404793
	5405088
	5408220
	5409682
	5409712
	5410448
	5412589
	5416304
	5419043
	5428406
	5443613
	5447197
	5449816
	5457634
	5457964
	5458094
	5458946
	5459169
	5459774
	5462703
	5464613
	5467389
	5468461
	5479830
	5480690
	5482738
	5487275
	5487995
	5488841
	5491621
	5496339
	5499067
	5505437
	5514703
	5515302
	5516389
	5519095
	5529817
	5532175
	5532500
	5545707
	5545721
	5545953
	5551111
	5553123
	5553832
	5554005
	5555615
	5555692
	5556007
	5561865
	5564882
	5565221
	5566912
	5567929
	5568799
	5575815
	5576076
	5576448
	5582152
	5582368
	5583969
	5587672
	5590841
	5591421
	5594906
	5600333
	5600401
	5606565
	5606596
	5609463
	5610896
	5617828
	5619499
	5621234
	5636235
	5640353
	5642204
	5643574
	5644802
	5646543
	5646738
	5648512
	5650270
	5652042
	5655742
	5655797
	5657373
	5663802
	5664973
	5666305
	5688811
	5689139
	5691181
	5692672
	5694778
	5697353
	5701039
	5707755
	5712958
	5717076
	5717216
	5720393
	5725572
	5729521
	5731063
	5734392
	5735478
	5739775
	5741681
	5744116
	5749036
	5749773
	5749929
	5750757
	5753561
	5758496
	5759715
	5768935
	5770147
	5771466
	5773768
	5776148
	5779130
	5781052
	5782053
	5783858
	5791476
	5792331
	5792654
	5799285
	5800137
	5810674
	5812102
	5814665
	5831309
	5838122
	5839085
	5840265
[truncated: 48,001 more rows]
